# Supplementary material for: Prostate MRI: Evaluating Tumor Volume and Apparent Diffusion Coefficient as Surrogate Biomarkers for Predicting Tumor Gleason Score
Source: Oxford University Press journal article supplement (doi:10.1158/1078-0432.ccr-14-0044), 2014-05-21
Supplement: 10780432ccr140044-sup-125249_2_supp_0_njjywv.docx [file 10780432ccr140044-sup-125249_2_supp_0_njjywv.docx]

### Supplemental Table 2 - Lesion Characteristics

| Total Lesions; n | 399 |
| --- | --- |
| Volume on histopathology [mL]; median (range) | 0.14 (0.003-14.35) |
| Total lesions > 0.5 mL; n (%) | 116 (29.1) |
| PZ; n (%) | 89 (76.7) |
| TZ; n (%) | 27 (23.3) |
| Volume [mL]; median (range) | 0.96 (0.51-14.35) |
| GS of lesions > 0.5 mL; n (%) |  |
| 3+3 | 16 (13.8) |
| 3+4 | 73 (62.9) |
| 4+3 | 19 (16.4) |
| 4+4 | 2 (1.7) |
| 4+5 | 5 (4.3) |
| 5+5 | 1 (0.9) |

Note: PZ = peripheral zone; TZ = transition zone; GS = Gleason score
