# Supplementary material for: Prostate MRI: Evaluating Tumor Volume and Apparent Diffusion Coefficient as Surrogate Biomarkers for Predicting Tumor Gleason Score
Source: Oxford University Press journal article supplement (doi:10.1158/1078-0432.ccr-14-0044), 2014-05-21
Supplement: 10780432ccr140044-sup-125249_2_supp_0_nzzyz8.docx [file 10780432ccr140044-sup-125249_2_supp_0_nzzyz8.docx]

### Supplemental Table 1 - Patient Demographics

|  | **Patients (n=131)** |
| --- | --- |
| **Age at MRI (years); median (range)** | 60 (42-81) |
| **PSA at diagnosis [ng/mL]; median (range)** | 4.6 (0.5-33.9) |
| **Time between MRI and prostatectomy (days); median (range)** | 22 (1-168) |
| **Clinical Stage at Prostatectomy*; n (%)** |  |
| T2a | 20 (15) |
| T2b | 68 (52) |
| T3a | 33 (25) |
| T3b | 8 (6) |
| T4 | 2 (2) |
| **GS at prostatectomy; n (%)** |  |
| **3+3** | 26 (20) |
| **3+4** | 75 (57) |
| **4+3** | 22 (17) |
| **4+4** | 2 (1) |
| **4+5** | 5 (4) |
| **5+4** | 1 (1) |

*Staging according to AJCC 1997 ([29](#_ENREF_29)). Note: GS = Gleason score.
